# Supplementary material for: Prolonged Exposure to Particulate Pollution, Genes Associated with Glutathione Pathways, and DNA Methylation in a Cohort of Older Men
Source: PubMed Central journal article supplement (PMC3222977; doi:10.1289/ehp.1002773), 2011-03-08
Supplement: ehp.1002773.s001.pdf [file ehp.1002773.s001.pdf]

Supplemental Material

Prolonged Exposure to Particulate Pollution, Genes Associated With Glutathione Pathways and DNA Methylation in a Cohort of Older Men

Jaime Madrigano  
Andrea Baccarelli  
Murray A. Mittleman  
Robert O. Wright  
David Sparrow  
Pantel S. Vokonas  
Letizia Tarantini  
Joel Schwartz

## *Genotyping Methods*

### *GSTM1*

Genotyping for the glutathione *S*-transferase mu-1 (*GSTM1*) deletion copy number variant (UniGene Hs.301961; (UniGene 2010b)) was done at the Harvard School of Public Health. The assay consists of polymerase chain reaction (PCR) amplification of exons 4 and 5 of the *GSTM1* allele. Because this polymorphism is a gene deletion, the PCR product indicates the presence of at least one copy of the gene. Subjects who are homozygous null are therefore compared to subjects with 1 or 2 copies of the gene. In each case, concomitant amplification of the cytochrome P450 1A1 gene (*CYP1A1*) (UniGene Hs.72912; (UniGene 2010a)) was done as a positive control. The PCR amplification of *CYP1A1* results in a 312 base-pair product that is easily visualized in the presence or absence of the *GSTM1* 273 base-pair PCR product. The DNA template was prepared by mixing whole blood (0.5–1.0  $\mu$ L) with reaction buffer and primers, followed by incubation. To this, 2.5 U Amplitaq was added; PCR was then performed, yielding the 273 base-pair product.

### *GSTP1*

We genotyped two single nucleotide polymorphisms (SNPs) on the glutathione *S*-transferase pi-1 gene (*GSTP1*) (UniGene Hs.523836; (UniGene 2010c)): Ile105Val (A313G, rs1695), caused by an A-to-G substitution that changes codon 105 from ATC (Ile) to GTC (Val); and Ala114Val (C2293T, rs1799811), a C-to-T substitution that changes codon 114 from GCG (Ala) to GTG (Val) (Ali-Osman et al. 1997). Both SNPs were genotyped using unlabeled mini-sequencing reactions and mass spectrometry via a

Sequenom Mass Array MALDI-TOF (matrix-assisted laser desorption ionization time-of-flight) mass spectrometer (Sequenom, San Diego, CA) (Sun et al. 2000).

### *GSTT1*

Analyses were performed using the TaqMan 5' nuclease real-time quantitative PCR assay. Subjects were genotyped for glutathione *S*-transferase theta-1 gene (*GSTT1*) deletions (UniGene Hs.268573; (UniGene 2010d)). For this analysis, the following primers and probe were used: *GSTT1* exon 1 forward primer (5'-caggtcagcacttaagcgatgc-3'), *GSTT1* reverse primer (5'-cagcagtctagg tcccagta-3'), and *GSTT1* probe (5'-Famcctcaaggctggcaccttcttgagg-Tamra-3').

Table S.1. Distribution of pollutants by season and over entire study period, March 1999 – November 2007 ( $\mu\text{g}/\text{m}^3$ )

| Pollutant         | Averaging Period | Season       | Mean (SD)    | IQR     | ANOVA <i>P</i> -value <sup>a</sup> |
|-------------------|------------------|--------------|--------------|---------|------------------------------------|
| PM <sub>2.5</sub> | 28-day           | Spring       | 8.76 (1.73)  | 1.97    | <0.0001                            |
|                   |                  | Summer       | 12.60 (2.80) | 3.01    |                                    |
|                   |                  | Fall         | 9.39 (1.60)  | 2.25    |                                    |
|                   |                  | Winter       | 10.66 (2.13) | 3.36    |                                    |
|                   |                  | All          | 10.31 (2.58) | 3.33    |                                    |
|                   | 45-day           | Spring       | 8.83 (1.58)  | 2.03    | <0.0001                            |
|                   |                  | Summer       | 12.16 (2.71) | 3.39    |                                    |
|                   |                  | Fall         | 9.75 (1.79)  | 2.25    |                                    |
|                   |                  | Winter       | 10.42 (1.84) | 2.72    |                                    |
|                   |                  | All          | 10.29 (2.39) | 2.97    |                                    |
|                   | 60-day           | Spring       | 9.00 (1.54)  | 2.10    | <0.0001                            |
|                   |                  | Summer       | 11.61 (2.43) | 2.92    |                                    |
|                   |                  | Fall         | 10.19 (1.91) | 2.21    |                                    |
|                   |                  | Winter       | 10.26 (1.72) | 2.61    |                                    |
|                   |                  | All          | 10.29 (2.17) | 2.66    |                                    |
|                   | 90-day           | Spring       | 9.43 (1.53)  | 2.12    | <0.0001                            |
|                   |                  | Summer       | 10.83 (1.97) | 2.89    |                                    |
|                   |                  | Fall         | 11.04 (1.94) | 2.32    |                                    |
|                   |                  | Winter       | 10.03 (1.51) | 2.80    |                                    |
|                   |                  | All          | 10.42 (1.91) | 2.32    |                                    |
| 180-day           | Spring           | 9.98 (1.24)  | 2.16         | <0.0001 |                                    |
|                   | Summer           | 10.20 (1.24) | 1.52         |         |                                    |
|                   | Fall             | 10.98 (1.22) | 2.10         |         |                                    |
|                   | Winter           | 10.62 (1.31) | 1.64         |         |                                    |
|                   | All              | 10.47 (1.31) | 1.53         |         |                                    |

Table S.1 (continued)

| Pollutant | Averaging Period | Season      | Mean (SD)   | IQR     | ANOVA <i>P</i> -value <sup>a</sup> |
|-----------|------------------|-------------|-------------|---------|------------------------------------|
| BC        | 28-day           | Spring      | 0.60 (0.13) | 0.21    | <0.0001                            |
|           |                  | Summer      | 0.86 (0.16) | 0.21    |                                    |
|           |                  | Fall        | 0.83 (0.14) | 0.21    |                                    |
|           |                  | Winter      | 0.76 (0.18) | 0.30    |                                    |
|           |                  | All         | 0.77 (0.18) | 0.27    |                                    |
|           | 45-day           | Spring      | 0.61 (0.13) | 0.18    | <0.0001                            |
|           |                  | Summer      | 0.84 (0.16) | 0.24    |                                    |
|           |                  | Fall        | 0.84 (0.13) | 0.22    |                                    |
|           |                  | Winter      | 0.76 (0.16) | 0.26    |                                    |
|           |                  | All         | 0.77 (0.17) | 0.27    |                                    |
|           | 60-day           | Spring      | 0.62 (0.14) | 0.17    | <0.0001                            |
|           |                  | Summer      | 0.80 (0.15) | 0.22    |                                    |
|           |                  | Fall        | 0.86 (0.13) | 0.21    |                                    |
|           |                  | Winter      | 0.76 (0.14) | 0.25    |                                    |
|           |                  | All         | 0.77 (0.17) | 0.25    |                                    |
|           | 90-day           | Spring      | 0.65 (0.15) | 0.18    | <0.0001                            |
|           |                  | Summer      | 0.75 (0.14) | 0.19    |                                    |
|           |                  | Fall        | 0.88 (0.12) | 0.23    |                                    |
|           |                  | Winter      | 0.78 (0.12) | 0.19    |                                    |
|           |                  | All         | 0.77 (0.16) | 0.24    |                                    |
| 180-day   | Spring           | 0.73 (0.14) | 0.23        | <0.0001 |                                    |
|           | Summer           | 0.72 (0.12) | 0.19        |         |                                    |
|           | Fall             | 0.82 (0.11) | 0.18        |         |                                    |
|           | Winter           | 0.84 (0.11) | 0.20        |         |                                    |
|           | All              | 0.77 (0.13) | 0.21        |         |                                    |

Table S.1 (continued)

| Pollutant       | Averaging Period | Season      | Mean (SD)   | IQR     | ANOVA <i>P</i> -value <sup>a</sup> |
|-----------------|------------------|-------------|-------------|---------|------------------------------------|
| SO <sub>4</sub> | 28-day           | Spring      | 2.72 (0.51) | 0.73    | <0.0001                            |
|                 |                  | Summer      | 3.92 (0.96) | 1.40    |                                    |
|                 |                  | Fall        | 2.82 (0.63) | 0.96    |                                    |
|                 |                  | Winter      | 2.69 (0.52) | 0.56    |                                    |
|                 |                  | All         | 3.04 (0.85) | 1.04    |                                    |
|                 | 45-day           | Spring      | 2.72 (0.39) | 0.53    | <0.0001                            |
|                 |                  | Summer      | 3.73 (0.78) | 1.09    |                                    |
|                 |                  | Fall        | 3.04 (0.69) | 0.97    |                                    |
|                 |                  | Winter      | 2.62 (0.42) | 0.51    |                                    |
|                 |                  | All         | 3.06 (0.75) | 0.93    |                                    |
|                 | 60-day           | Spring      | 2.73 (0.36) | 0.45    | <0.0001                            |
|                 |                  | Summer      | 3.56 (0.74) | 0.90    |                                    |
|                 |                  | Fall        | 3.20 (0.65) | 0.88    |                                    |
|                 |                  | Winter      | 2.59 (0.38) | 0.49    |                                    |
|                 |                  | All         | 3.06 (0.69) | 0.93    |                                    |
|                 | 90-day           | Spring      | 2.76 (0.33) | 0.48    | <0.0001                            |
|                 |                  | Summer      | 3.33 (0.57) | 0.68    |                                    |
|                 |                  | Fall        | 3.51 (0.58) | 0.92    |                                    |
|                 |                  | Winter      | 2.60 (0.30) | 0.41    |                                    |
|                 |                  | All         | 3.12 (0.61) | 0.83    |                                    |
| 180-day         | Spring           | 2.68 (0.23) | 0.36        | <0.0001 |                                    |
|                 | Summer           | 3.04 (0.33) | 0.43        |         |                                    |
|                 | Fall             | 3.43 (0.29) | 0.40        |         |                                    |
|                 | Winter           | 3.12 (0.35) | 0.52        |         |                                    |
|                 | All              | 3.10 (0.41) | 0.59        |         |                                    |

<sup>a</sup> ANOVA test comparing the pollutant mean across seasons.

Table S.2. Change in LINE-1 and Alu methylation (% 5mC) associated with an Interquartile Range (IQR) increase in Pollutant, Adjusting for season through a sine and cosine function of time

| Exposure                | LINE-1<br>beta <sup>a</sup> (95% CI) | Alu<br>beta (95% CI)  | IQR<br>(µg/m <sup>3</sup> ) |
|-------------------------|--------------------------------------|-----------------------|-----------------------------|
| <b>PM<sub>2.5</sub></b> |                                      |                       |                             |
| 28-day avg              | -0.03 (-0.17, 0.11)                  | 0.03 (-0.06, 0.12)    | 3.33                        |
| 45-day avg              | -0.04 (-0.18, 0.10)                  | 0.04 (-0.05, 0.13)    | 2.97                        |
| 60-day avg              | -0.05 (-0.19, 0.09)                  | 0.05 (-0.04, 0.14)    | 2.66                        |
| 90-day avg              | -0.01 (-0.15, 0.14)                  | 0.04 (-0.05, 0.14)    | 2.32                        |
| 180-day avg             | 0.05 (-0.07, 0.17)                   | 0.08 (0.00, 0.16)*    | 1.53                        |
| <b>Black Carbon</b>     |                                      |                       |                             |
| 28-day avg              | -0.22 (-0.43, -0.01)*                | 0.01 (-0.13, 0.15)    | 0.27                        |
| 45-day avg              | -0.31 (-0.58, -0.04)*                | -0.13 (-0.31, 0.05)   | 0.27                        |
| 60-day avg              | -0.29 (-0.58, 0.00)*                 | -0.18 (-0.37, 0.00)   | 0.25                        |
| 90-day avg              | -0.35 (-0.68, -0.01)*                | -0.42 (-0.64, -0.20)* | 0.24                        |
| 180-day avg             | 0.11 (-0.31, 0.52)                   | -0.29 (-0.56, -0.01)* | 0.21                        |
| <b>Sulfate</b>          |                                      |                       |                             |
| 28-day avg              | -0.14 (-0.30, 0.03)                  | 0.02 (-0.09, 0.13)    | 1.04                        |
| 45-day avg              | -0.15 (-0.35, 0.04)                  | -0.09 (-0.22, 0.04)   | 0.93                        |
| 60-day avg              | -0.19 (-0.42, 0.03)                  | -0.05 (-0.20, 0.10)   | 0.93                        |
| 90-day avg              | -0.30 (-0.56, -0.05)*                | -0.05 (-0.23, 0.12)   | 0.83                        |
| 180-day avg             | -0.15 (-0.40, 0.10)                  | -0.01 (-0.17, 0.16)   | 0.59                        |

<sup>a</sup> Regression coefficient representing the change (%5-methyl-cytosine / IQR in pollutant).

\*  $p \leq 0.05$

## References

- Ali-Osman F, Akande O, Antoun G, Mao JX, Buolamwini J. 1997. Molecular cloning, characterization, and expression in escherichia coli of full-length cDNAs of three human glutathione S-transferase pi gene variants. evidence for differential catalytic activity of the encoded proteins. *J Biol Chem* 272(15):10004-10012.
- Sun X, Ding H, Hung K, Guo B. 2000. A new MALDI-TOF based mini-sequencing assay for genotyping of SNPS. *Nucleic Acids Res* 28(12):E68.
- UniGene. 2010a. Cytochrome P450, Family 1, Subfamily A, Polypeptide 1. <http://www.ncbi.nlm.nih.gov/ezp-prod1.hul.harvard.edu/UniGene/clust.cgi?UGID=139520&TAXID=9606&SEARCH=cyp1a1> ed. Bethesda, MD:National Center for Biotechnology Information.
- UniGene. 2010b. Glutathione S-Transferase Mu 1. <http://www.ncbi.nlm.nih.gov/ezp-prod1.hul.harvard.edu/UniGene/clust.cgi?UGID=181321&TAXID=9606&SEARCH=gstm1> ed. Bethesda, MD:National Center for Biotechnology Information.
- UniGene. 2010c. Glutathione S-Transferase Pi 1. <http://www.ncbi.nlm.nih.gov/ezp-prod1.hul.harvard.edu/UniGene/clust.cgi?UGID=914583&TAXID=9606&SEARCH=gstp1> ed. Bethesda, MD:National Center for Biotechnology Information.
- UniGene. 2010d. Glutathione S-Transferase Theta 1. <http://www.ncbi.nlm.nih.gov/ezp-prod1.hul.harvard.edu/UniGene/clust.cgi?UGID=172432&TAXID=9606&SEARCH=gstt1> ed. Bethesda, MD:National Center for Biotechnology Information.
